# Supplementary material
Source: PubMed Central journal article supplement (PMC9128699)
Supplement: tpmd210176.SD1.pdf [file tpmd210176.SD1.pdf]

## Supplemental Information

### Methods

#### *Regression Analyses*

Multinomial logistic regression is applied when a response variable is a nonordinal, categorical variable with more than two levels; an extension of the logistic regression for dichotomous response variables [17]. When modeling categorical responses with multiple possible outcomes, ordinary least squares estimators are inappropriate, therefore maximum likelihood estimators should be used [17]. Multinomial logistic regression uses maximum likelihood estimation to calculate coefficients, whose exponentiated forms yield an odds ratio that are always compared to a reference category [17]. These coefficients and related covariates can be used to calculate changes in the probabilities of outcomes in response to changes in covariates using the following equation:

$$\Pr(y = j) = \frac{e^{\beta_j x}}{1 + \sum_{k=1}^{J-1} e^{\beta_k x}} \text{ for } j = 1, 2, \dots, J - 1$$

where the probability of outcome given J categories, x as a vector of explanatory variables, and  $\beta_k$  as the vector of coefficients for outcome k (adapted from Kwak & Clayton-Matthews, 2002). In this study, J is the reference outcome.

**Supplemental Table S1.** Model selection results of multinomial logistic regression analysis on patient treatment outcomes after the EVD outbreak. Only models with weight > 0.10 are shown.

| <b>Covariates</b>                                               | <b>K</b> | <b>ΔAIC</b> | <b>Weight</b> |
|-----------------------------------------------------------------|----------|-------------|---------------|
| <i>HIV Status x Age + TB Type + Months After Outbreak</i>       | 24       | -           | 0.65          |
| <i>HIV Status + Age + Sex + TB Type + Months After Outbreak</i> | 18       | 2.13        | 0.22          |
| <i>HIV Status x Age + Sex + TB Type + Months After Outbreak</i> | 27       | 3.32        | 0.12          |
